# Supplementary material for: Deleterious effects of endocrine disruptors are corrected in the mammalian germline by epigenome reprogramming
Source: PubMed Central journal article supplement (PMC4376074; doi:10.1186/s13059-015-0619-z), 2015-03-27

A

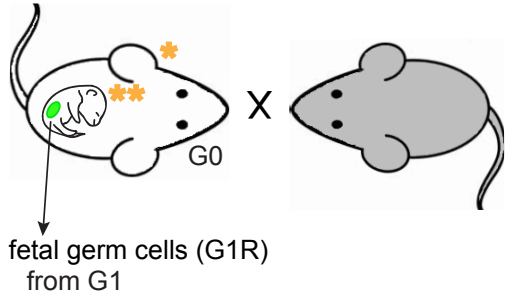

C

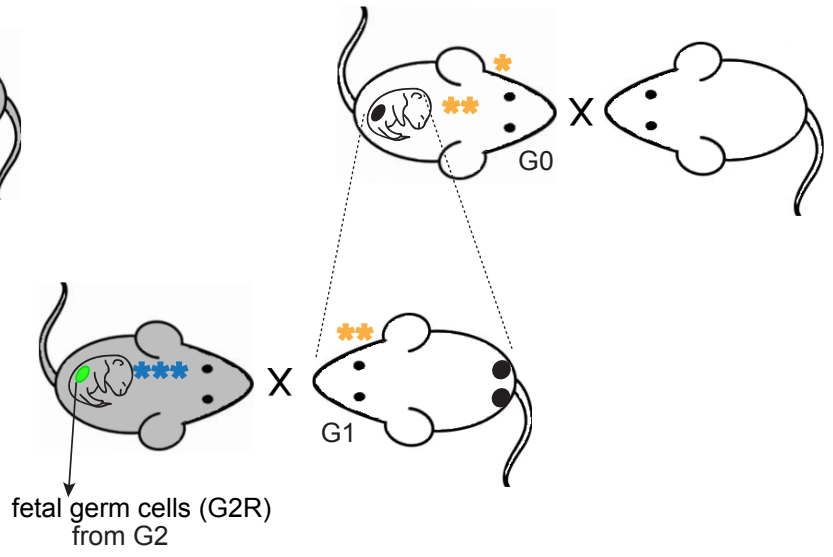

B

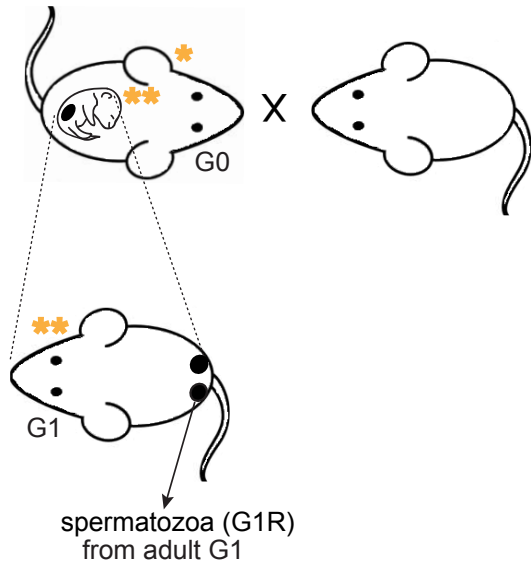

D

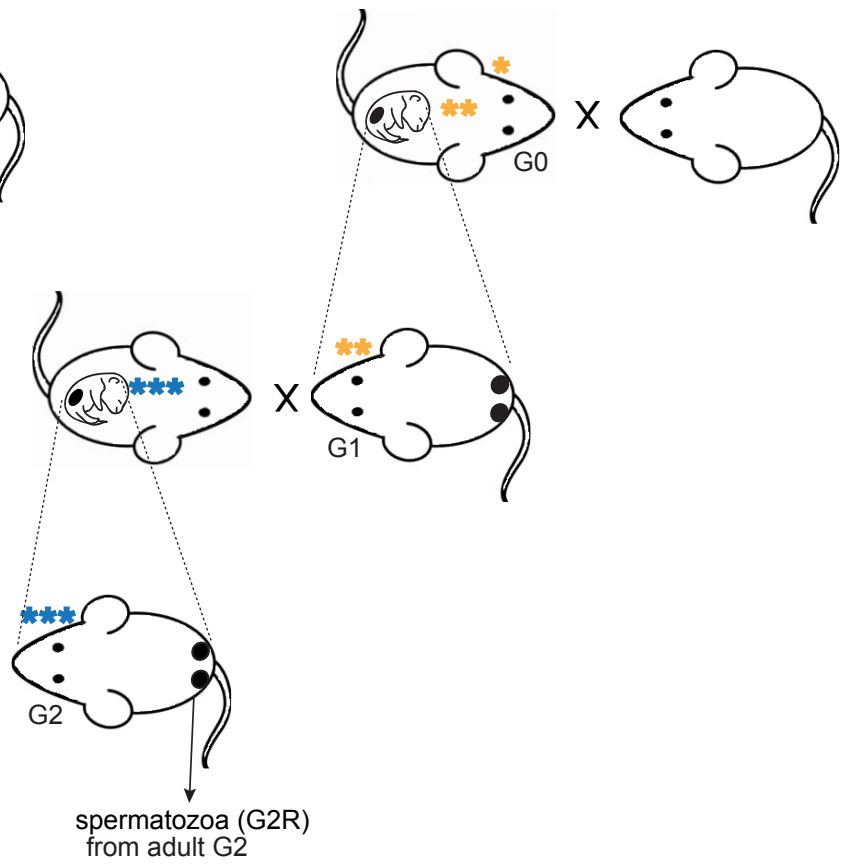

Supplement: 13059_2015_619_MOESM4_ESM.pdf [file 13059_2015_619_MOESM4_ESM.pdf]
