# Supplementary material for: Deleterious effects of endocrine disruptors are corrected in the mammalian germline by epigenome reprogramming
Source: PubMed Central journal article supplement (PMC4376074; doi:10.1186/s13059-015-0619-z), 2015-03-27

VZ MGC G1R-G2R

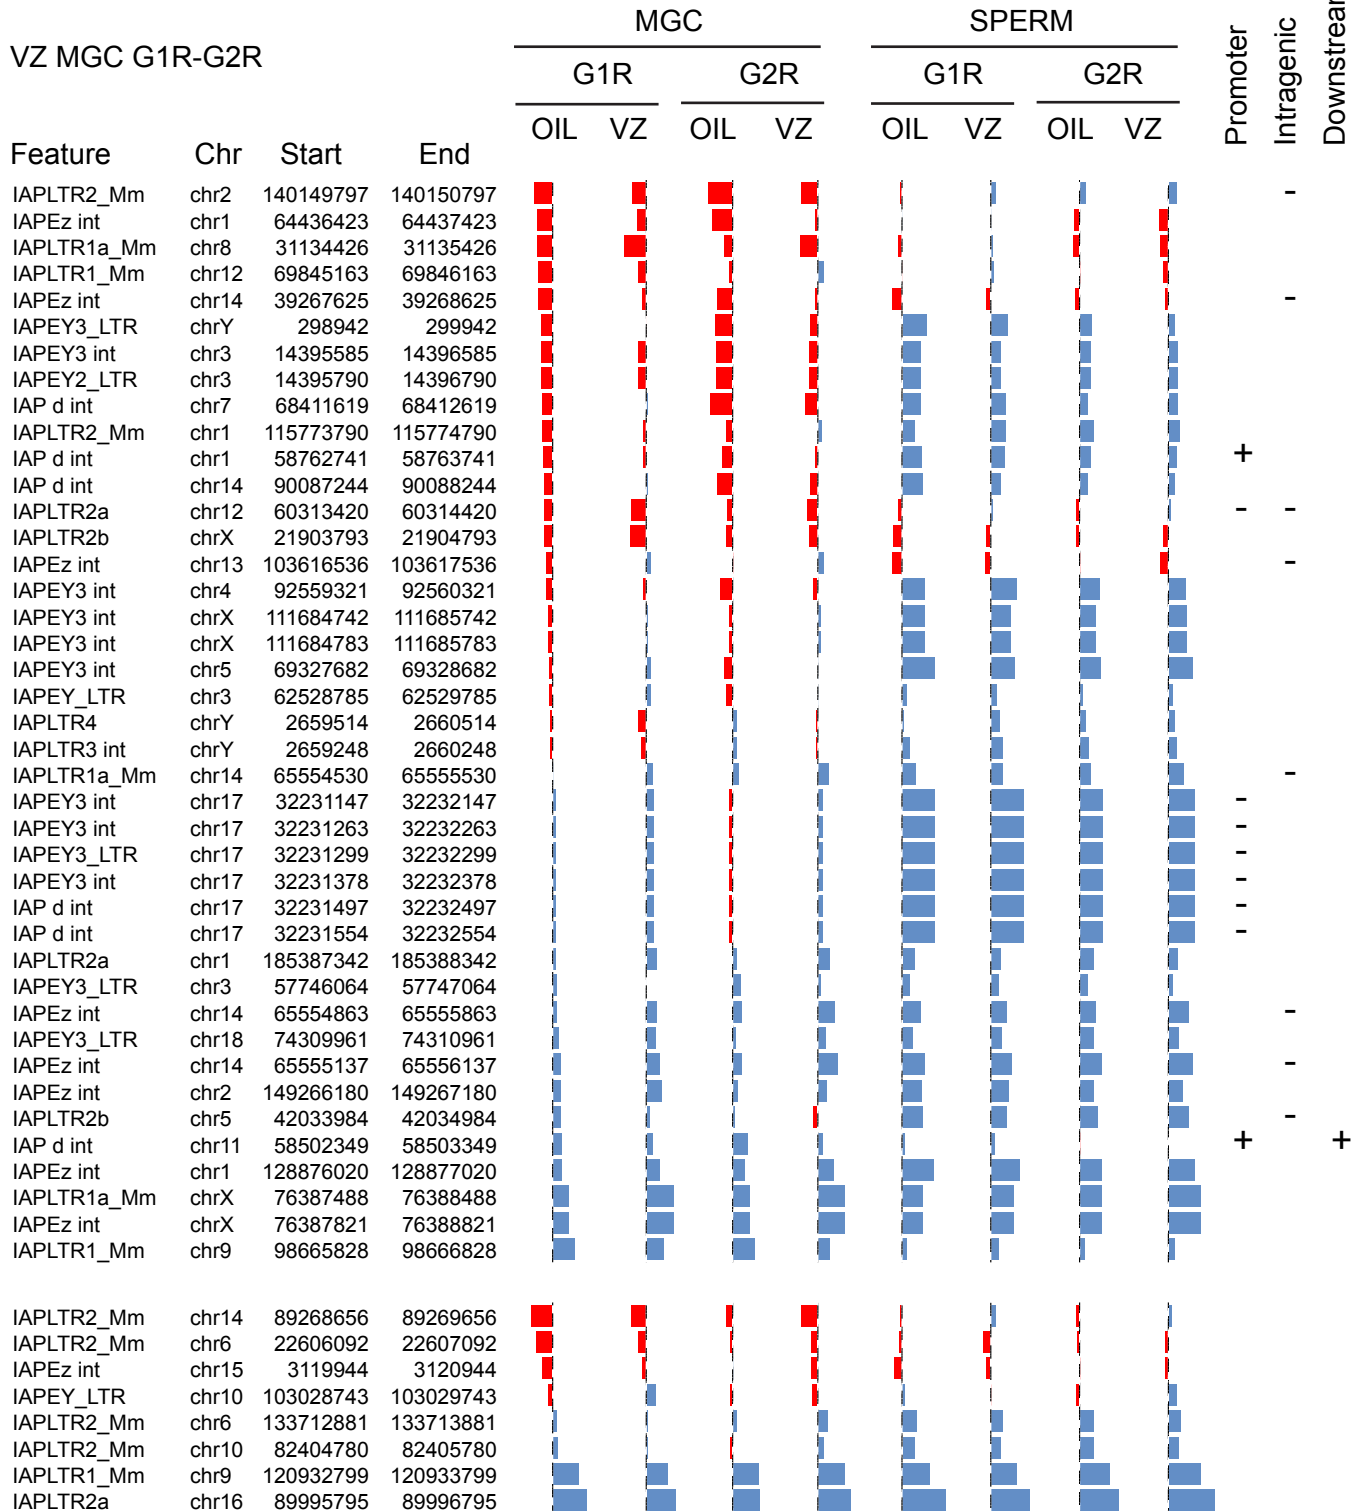

log2 R -1.2 ■ 2.1

VZ G1R MGC-Sperm

MGC

SPERM

Promoter  
Intragenic  
Downstream

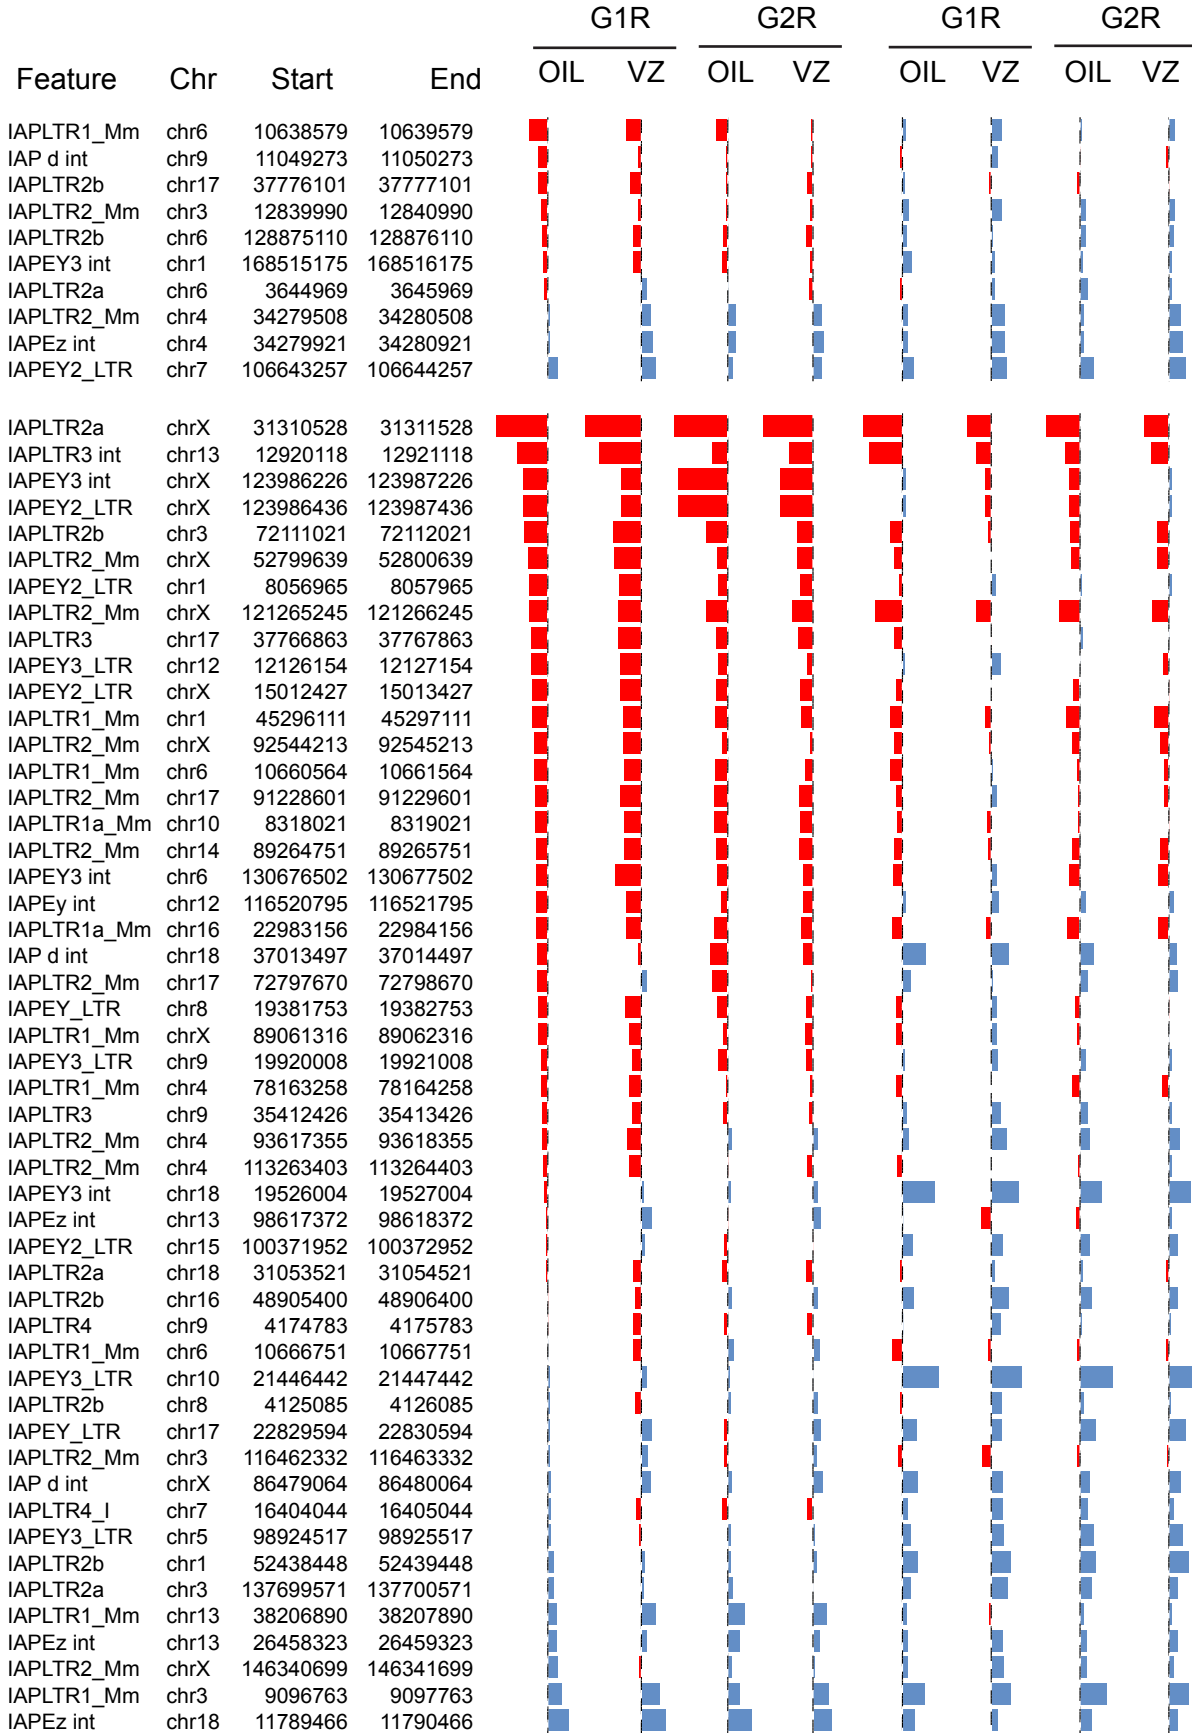

log2 R -3 ■ ■ 1.6

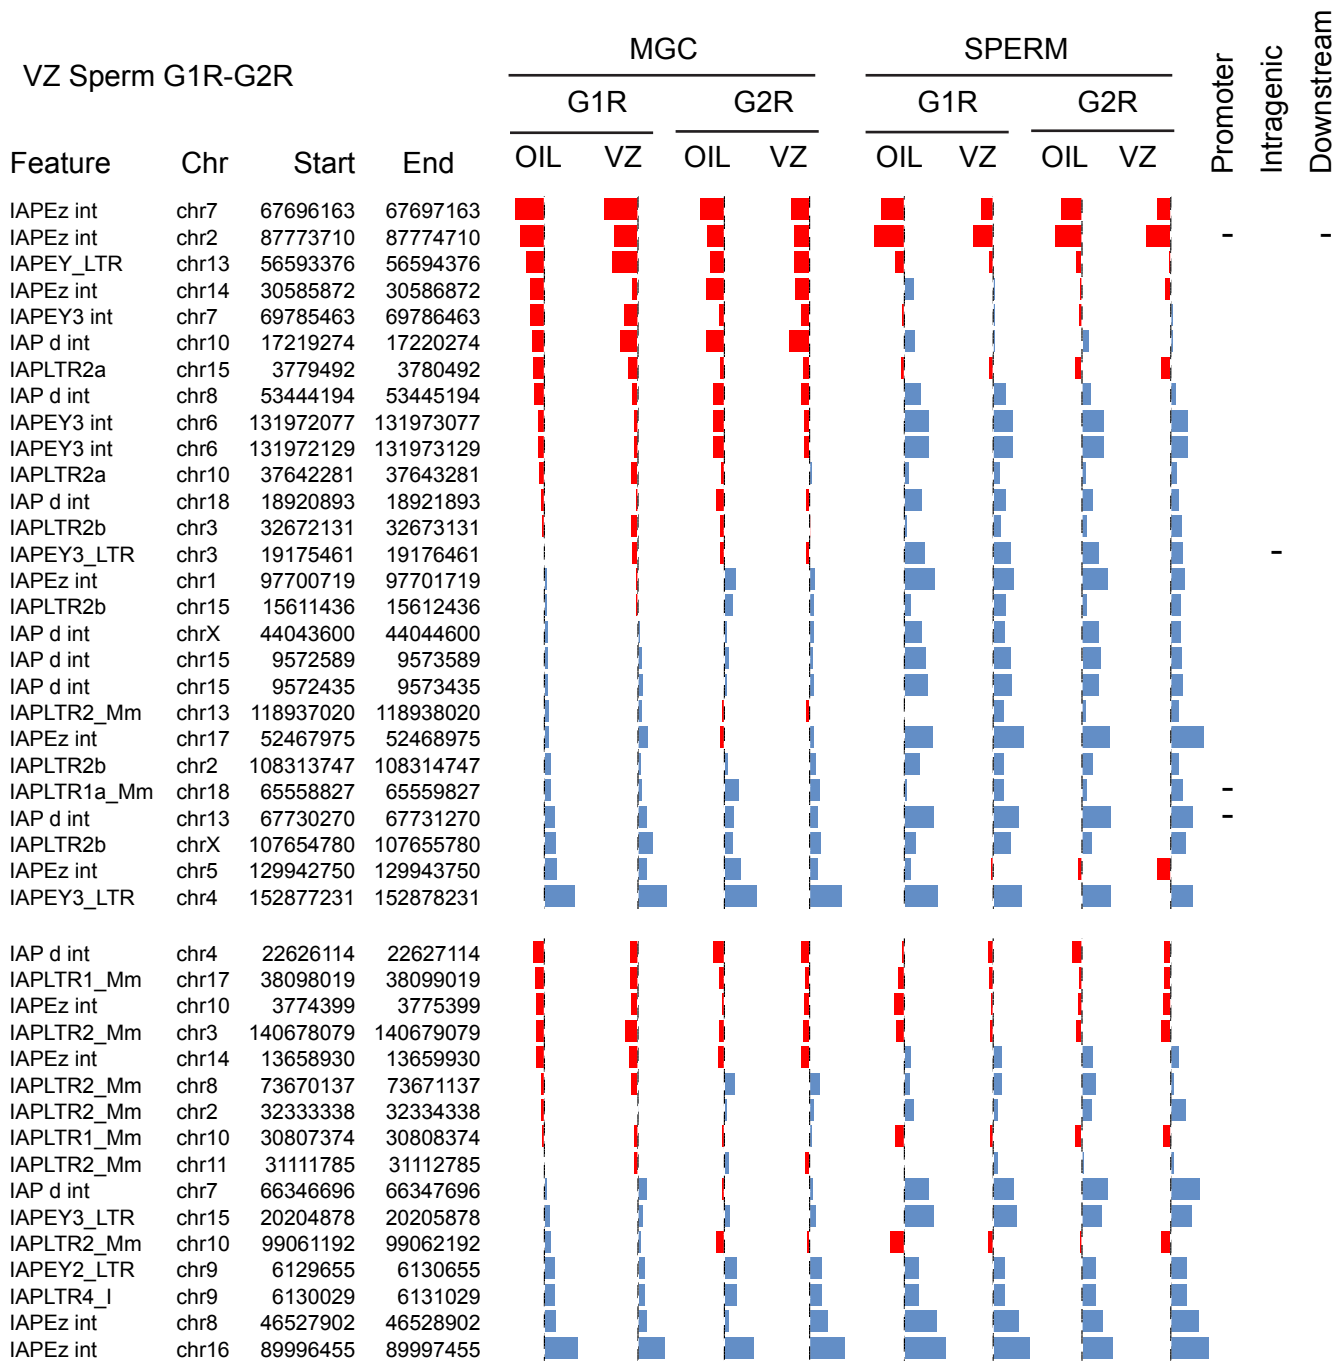

log2 R -1.8 ■ 1.8

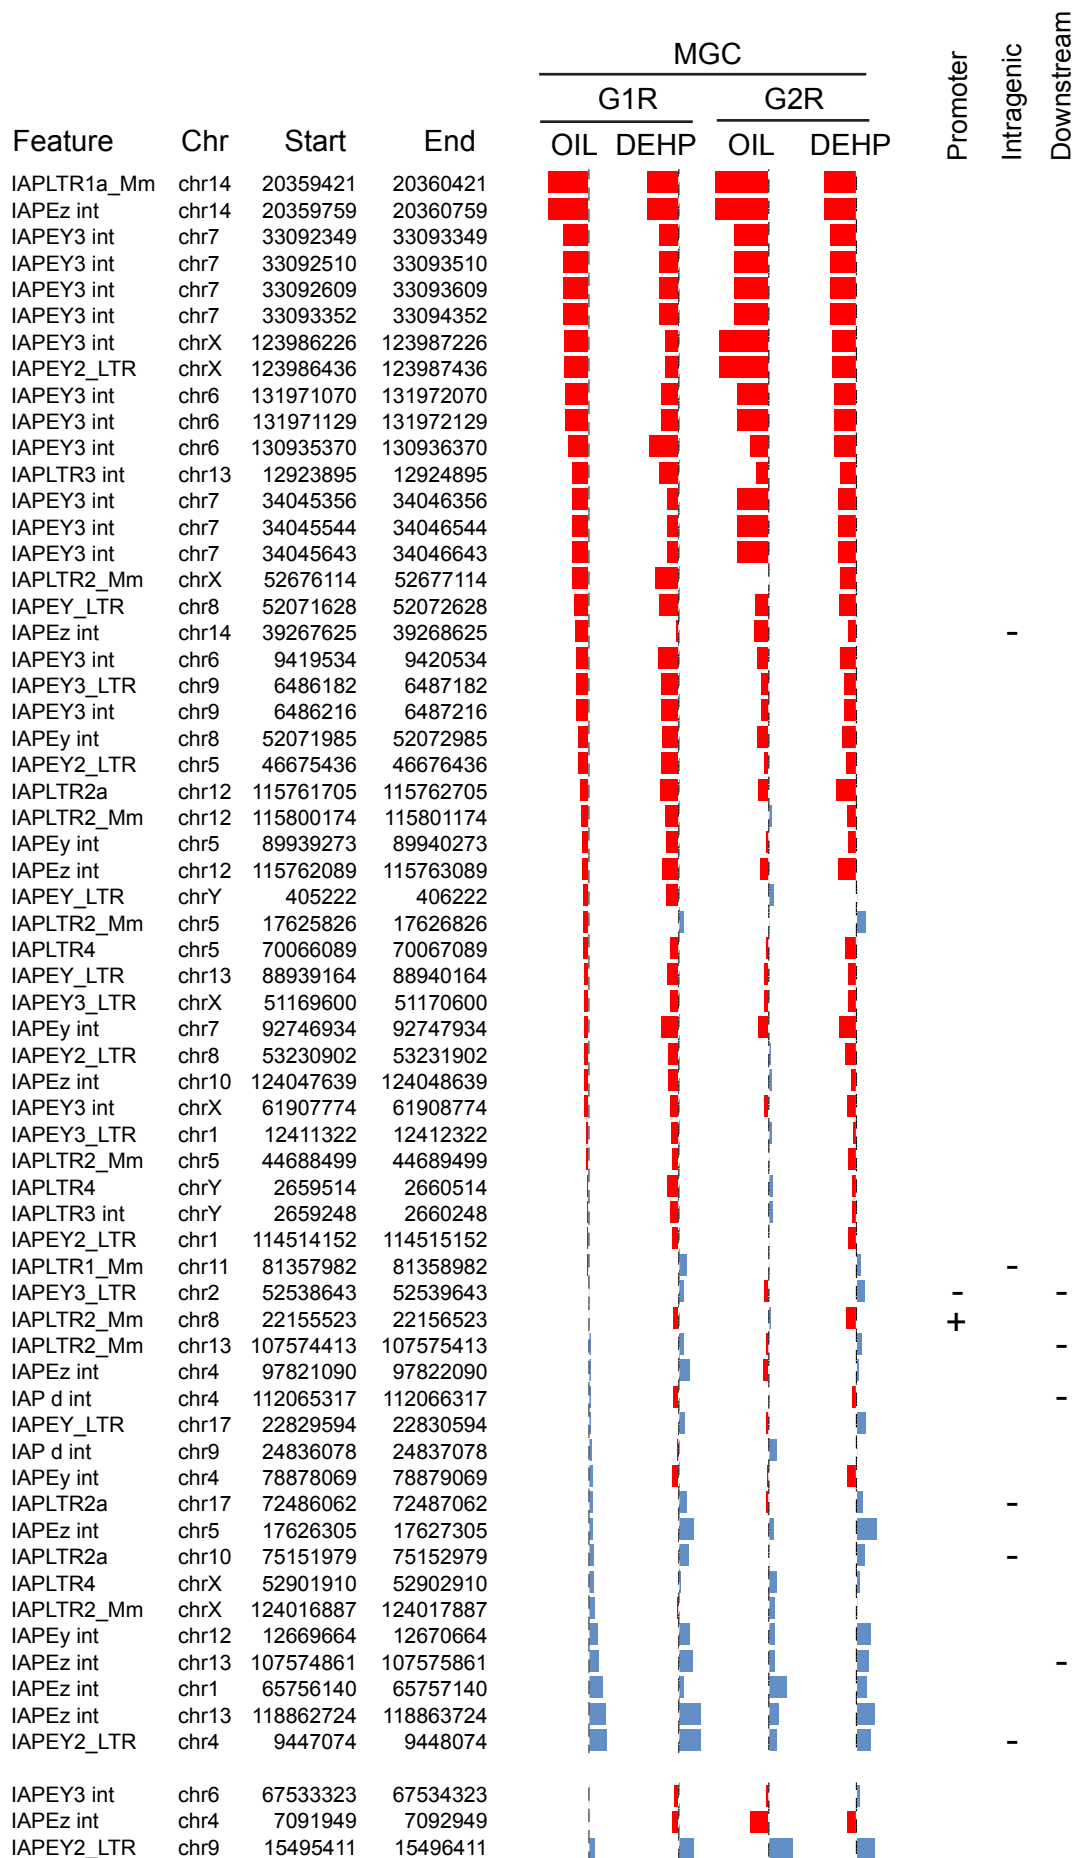

log2 R -2 ■ 1

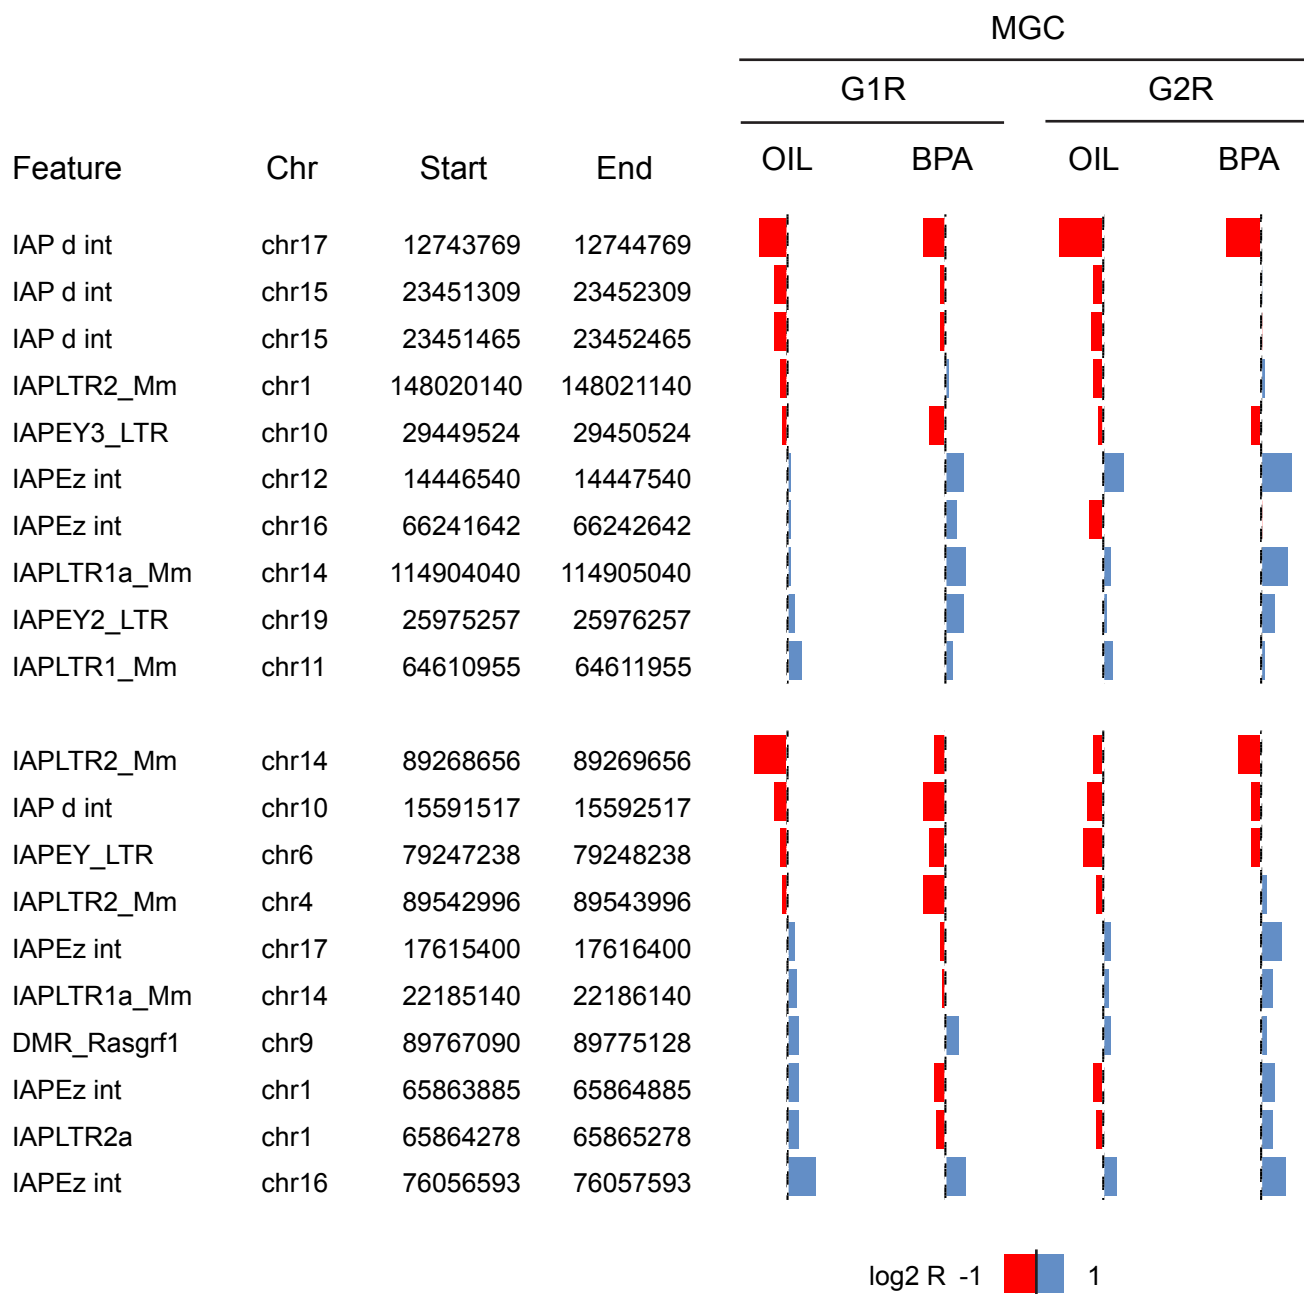

Supplement: 13059_2015_619_MOESM11_ESM.pdf [file 13059_2015_619_MOESM11_ESM.pdf]
